# Supplementary material for: Self-Administered Outpatient Antimicrobial Infusion by Uninsured Patients Discharged from a Safety-Net Hospital: A Propensity-Score-Balanced Retrospective Cohort Study
Source: PubMed Central journal article supplement (PMC4686020; doi:10.1371/journal.pmed.1001922), 2015-12-15
Supplement: pmed.1001922.s001.pdf [file pmed.1001922.s001.pdf]

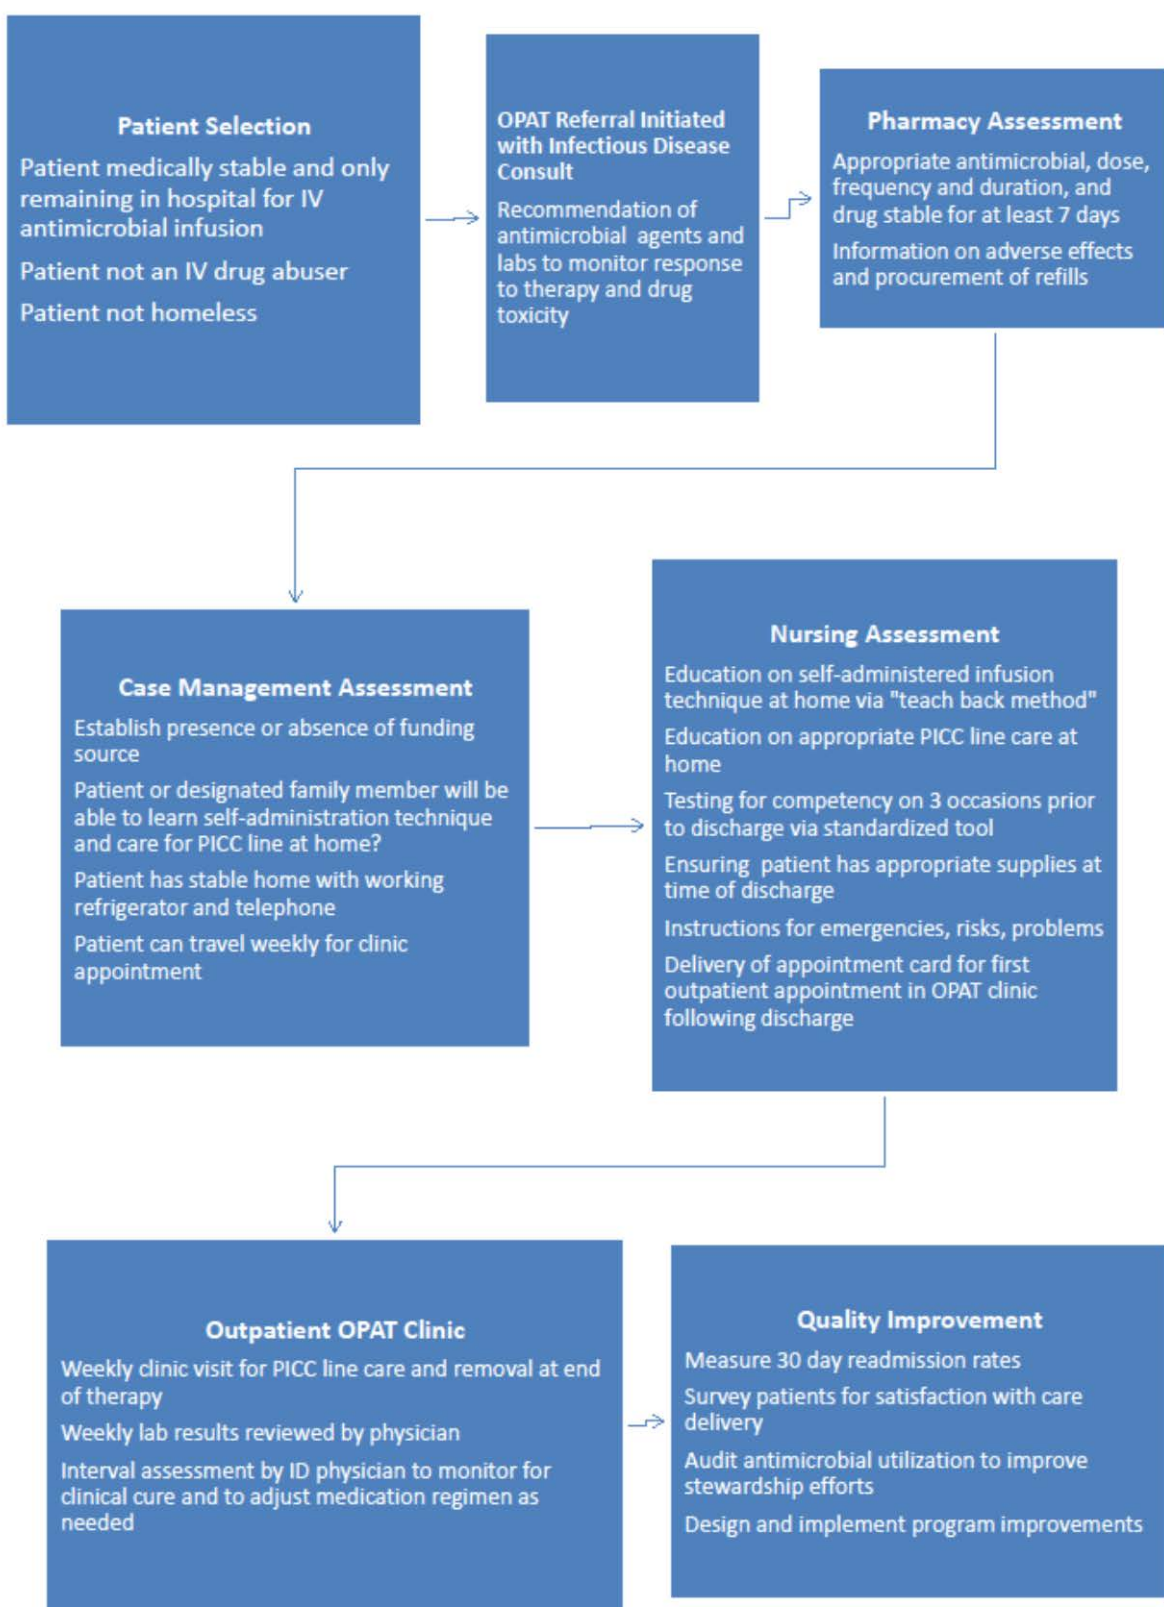

**Figure S1.** Self-administered OPAT protocol
