# Supplementary material for: Self-Administered Outpatient Antimicrobial Infusion by Uninsured Patients Discharged from a Safety-Net Hospital: A Propensity-Score-Balanced Retrospective Cohort Study
Source: PubMed Central journal article supplement (PMC4686020; doi:10.1371/journal.pmed.1001922), 2015-12-15
Supplement: pmed.1001922.s004.pdf [file pmed.1001922.s004.pdf]

\_\_\_\_\_. Revise usted mismo y asegurarse de que esta claro o transparente y que no tiene manchas o partículas flotando en él. Si no es claro, no lo use, tráigalo a la clínica en la próxima cita. Utilice otra bolsa que está claro.

Mantenga este antibiótico en el refrigerador?    Sí   o   No

- Cierre la pinza en el tubo o línea y ponga la punta en el puerto en de salida de la bolsa intravenosa de antibióticos.
- Apriete la cámara de goteo para iniciar el flujo del antibiótico IV. Llene la cámara de goteo a la mitad.
- Cuelgue la bolsa a un nivel más alto que su cabeza.
- Abra lentamente la pinza para que el IV antibióticos llene el tubo o línea. Esto empuja todo el aire del tubo.
- Cierre la válvula con la ruedita o disco.

Recuerde - no deje que la punta del tubo toque nada.

El nombre de su antibiótico IV, que debe ser mezcla es: \_\_\_\_\_ . Después de haberlo mezclado, verifique y asegurarse de que está claro o transparente y que no tiene manchas o partículas flotando en él. Si no está claro o transparente, no lo use. Tráigalo a la clínica en su próxima cita. Utilice otra bolsa que está claro.

Mantenga este antibiótico en el refrigerador?    Sí   o   No

- Mezcle cada dosis al momento antes de usarlo.

(continúa)

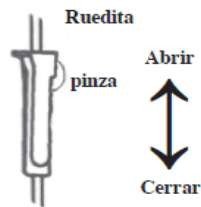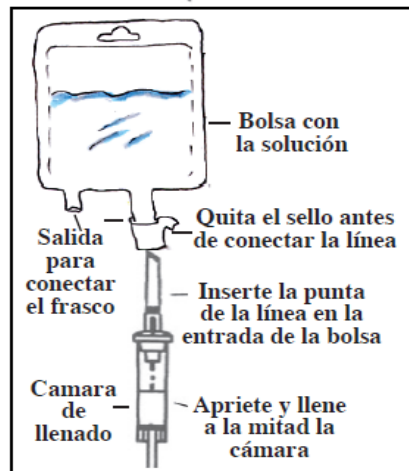

**Figure S4.** An excerpt from the Spanish language translation of the patient training materials explaining administration of intravenous fluids, illustrated by the diagram of an intravenous administration set
